# Supplementary material for: A three-dimensional metal–organic framework for a guest-free ultra-low dielectric material
Source: Royal Society of Chemistry journal article supplement (doi:10.1039/c9ra03032h), 2019-01-01
Supplement: c9ra03032h1.pdf [file c9ra03032h1.pdf]

## A three-dimensional metal-organic framework for guest-free ultra-low dielectric material

Wen Xu,<sup>#b</sup> Shanshan Yu,<sup>#a</sup> Hui Zhang,<sup>#a</sup> and Haibao Duan<sup>\*a,c</sup>

---

<sup>a</sup> School of Environmental Science, Nanjing Xiaozhuang University, Nanjing, 211171,, P.R.China

<sup>b</sup> Department of Chemistry, Huangshan University, Huangshan 245041, P.R. China

<sup>c</sup> Department of Chemistry and Biochemistry, University of California, Los Angeles, California 90095-1569, United States

E-mail:

duanhaibao4660@163.com

## 1. Experimental

### 1.1. Chemicals and reagents

The reagents and solvents were purchased from commercial sources and used without further purification.

### 1.2. Physical measurements

Elemental analyses (C, H and N) were performed with an Elementar Vario EL III analytical instrument. IR spectra were recorded on a Bruker Vector 22 Fourier Transform Infrared Spectrometer (170SX) (KBr disc). Thermogravimetric (TG) experiment was performed with a TA2000/2960 thermogravimetric analyzer from 30 to 800°C at a warming rate of 10 K/min under a nitrogen atmosphere, and the polycrystalline samples were placed in an aluminum crucible. Powder X-ray diffraction (PXRD) data for the as-prepared was collected using Bruker D8 Advance powder diffractometer operating at 40 kV and 40 mA with Cu K radiation  $\lambda = 1.5418 \text{ \AA}$  at ambient temperature. Temperature and frequency dependent dielectric constant,  $\epsilon'$ , and dielectric loss,  $\tan(\delta)$ , measurements were carried out employing Concept 80 system (Novocontrol, Germany); the powdered pellet, with a thickness of ca. 0.48 mm, was coated by gold films on the opposite surfaces and sandwiched by the copper electrodes and the ac frequencies span from 100 Hz to  $10^6$  Hz.

**X-ray crystallography.** Selected crystals of **1** at room temperature were centered on an Oxford Diffraction Xcalibur diffractometer equipped with a Sapphire 3 CCD detector and a graphite monochromated Mo K $\alpha$  ( $\lambda = 0.71073 \text{ \AA}$ ). The data collection routine, unit cell refinement, and data processing were carried out with the program CrysAlis.<sup>1</sup> Structures were solved by the direct method and refined by the full-matrix least-squares procedure on  $F^2$  using SHELXL-97 program.<sup>2</sup> The non-Hydrogen atoms were anisotropically refined using the full-matrix least-squares method on  $F^2$ . The crystallographic details about data collection, structural refinement are summarized in Table S1.

## References:

1. *CrysAlis V1.171*, Oxford Diffraction Ltd., Poland, 2004.
2. G. M. Sheldrick, *SHELXL-97*, Program for the Refinement of Crystal structure, University of Göttingen, Germany, 1997.

### 1.3. Preparations for 1

The synthesis procedure of compound **1** is in following described: First, the  $\text{Zn}(\text{NO}_3)_2 \cdot 6\text{H}_2\text{O}$  (0.075 g) and 4,4'-biphenyldicarboxylic acid (0.120 g) were dissolved in 10ml DMF. The mixture were stirred for 1h, then 0.021 g dimethylamine hydrochloride was added and stirred another 1h. The mixture were sealed in Teflon-lined autoclave and heated to 100 °C for 72h. Colorless needle-shape crystals were obtained in solution. The crystal was washed with DMF and acetone and dried in air.

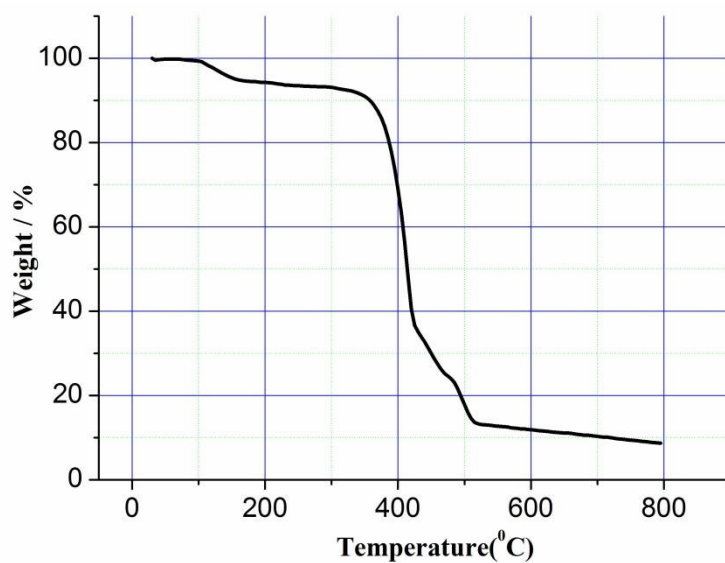

Figure S1 TG curves of compound **1**.

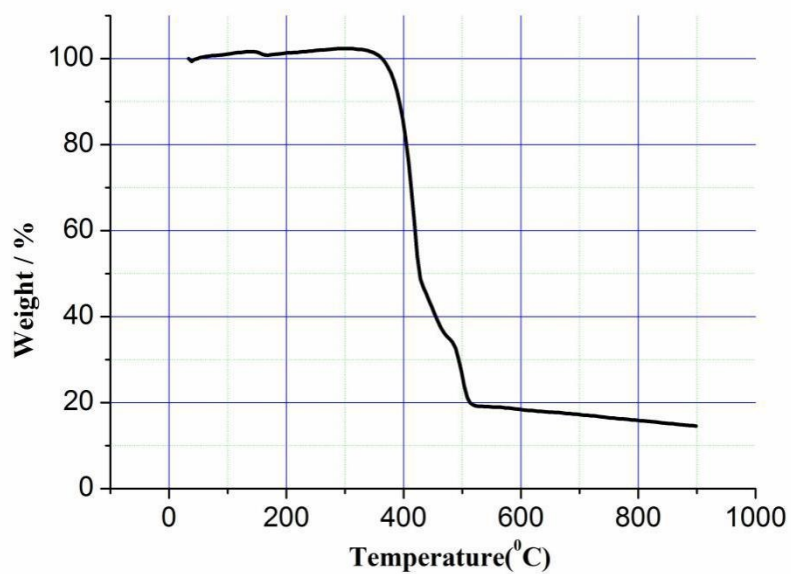

Figure S2 TG curves of compound **1'** showing high thermal stability.

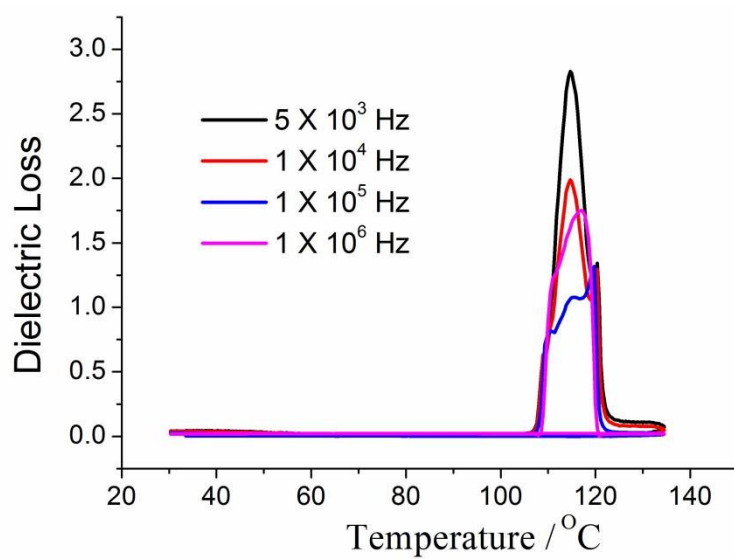

Figure S3 Temperature-dependent dielectric loss of **1** in the temperature range of 30-135°C.

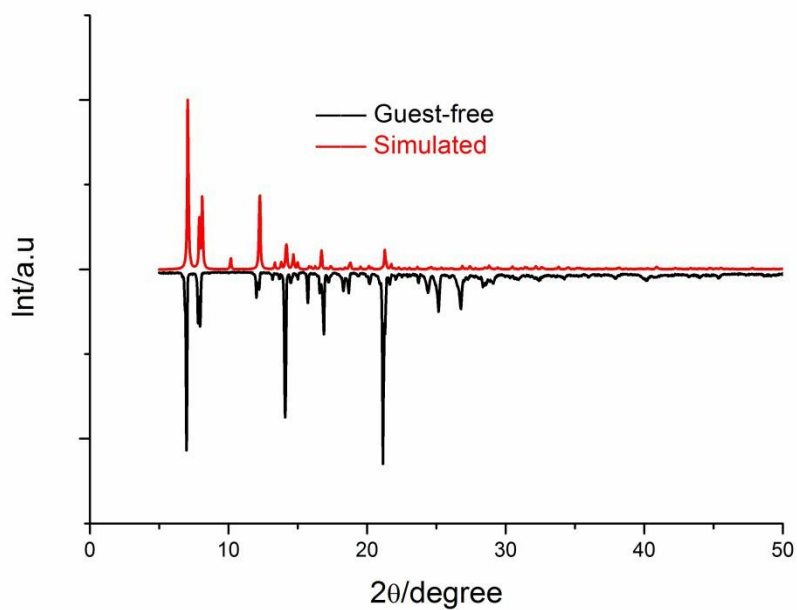

Figure S4 Powder X-ray diffraction patterns for sample of **1'**, confirming the sample **1** is stable after removing DMF (Black lines: experimental patterns of **1'**; red lines: simulated profiles of **1**).

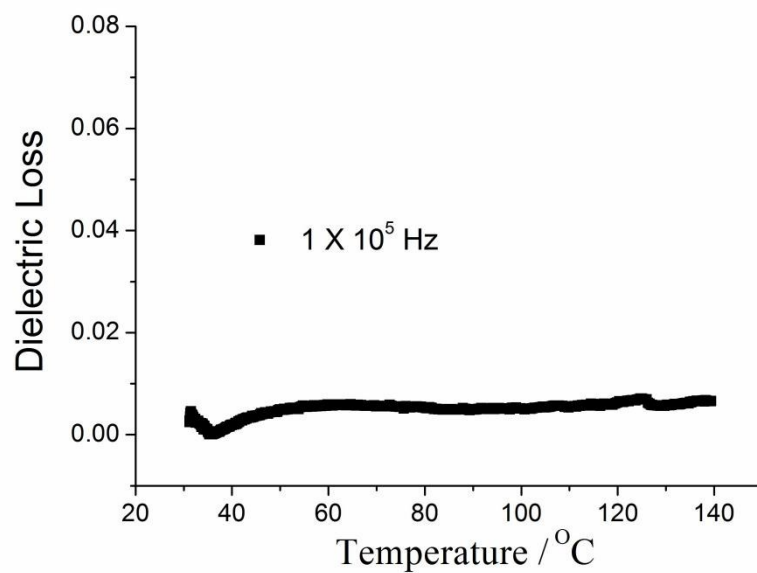

Figure S5 Temperature-dependent dielectric loss at 10<sup>5</sup>Hz of **1'**

Table S1 Crystal and structural refinement data for compound **1**

| Complex              | <b>1</b>                                                                       |
|----------------------|--------------------------------------------------------------------------------|
| Molecular formula    | C <sub>60</sub> H <sub>48</sub> N <sub>2</sub> O <sub>16</sub> Zn <sub>3</sub> |
| Space group          | Pna21                                                                          |
| Crystal system       | orthorhombic                                                                   |
| Temp/K               | 100(2)                                                                         |
| Wavelength (Å )      | 0.71073                                                                        |
| a/Å                  | 24.7046(12)                                                                    |
| b/Å                  | 14.5230(9)                                                                     |
| c/Å                  | 22.3879(12)                                                                    |
| α/°                  | 90                                                                             |
| β/°                  | 90                                                                             |
| γ/°                  | 90                                                                             |
| V/Å <sup>3</sup> . Z | 8032.4(8)                                                                      |
| μ/mm <sup>-1</sup>   | 0.939                                                                          |
| ρ/g cm <sup>-3</sup> | 1.033                                                                          |
| F000                 | 2560                                                                           |
| Index ranges         | -29 ≤ h ≤ 29                                                                   |
|                      | -17 ≤ k ≤ 13                                                                   |
|                      | -26 ≤ l ≤ 22                                                                   |
| R <sub>1</sub>       | 0.0540                                                                         |
| wR <sub>2</sub>      | 0.0764                                                                         |



| Table S2 Comparison of reported low-k MOFs (f≤0.1MHz) (ref 17a)                                                                                                                                                                                                                                                                                                                                                                                                                                                                                                                          |      |       |
|------------------------------------------------------------------------------------------------------------------------------------------------------------------------------------------------------------------------------------------------------------------------------------------------------------------------------------------------------------------------------------------------------------------------------------------------------------------------------------------------------------------------------------------------------------------------------------------|------|-------|
| MOF                                                                                                                                                                                                                                                                                                                                                                                                                                                                                                                                                                                      | k    | Ref.  |
| {Zn(MeIM) <sub>2</sub> } <sup>[a]</sup> ( ZIF-8)                                                                                                                                                                                                                                                                                                                                                                                                                                                                                                                                         | ≈2.4 | [17a] |
| {[Sr <sub>2</sub> (1,3-bdc) <sub>2</sub> (H <sub>2</sub> O) <sub>2</sub> ] • H <sub>2</sub> O} <sub>n</sub> <sup>[b]</sup>                                                                                                                                                                                                                                                                                                                                                                                                                                                               | ≈2.4 | [15c] |
| {[Pb(Tab) <sub>2</sub> (4,4'-bipy)] (PF <sub>6</sub> ) <sub>2</sub> • 2MeCN} <sup>[c]</sup>                                                                                                                                                                                                                                                                                                                                                                                                                                                                                              | ≈2.5 | [16d] |
| {[Zn <sub>2</sub> (L-trp) <sub>2</sub> (bpe) <sub>2</sub> (H <sub>2</sub> O) <sub>2</sub> ] • 2H <sub>2</sub> O • 2NO <sub>3</sub> } <sub>n</sub> <sup>[d]</sup>                                                                                                                                                                                                                                                                                                                                                                                                                         | ≈2.5 | [16a] |
| {Mn <sub>2</sub> (D-cam) <sub>2</sub> (2-Hpao) <sub>4</sub> } <sub>n</sub> <sup>[e]</sup>                                                                                                                                                                                                                                                                                                                                                                                                                                                                                                | ≈2.8 | [16e] |
| {[Co <sub>2</sub> (D-cam) <sub>2</sub> -(3-abpt) <sub>2</sub> (H <sub>2</sub> O) <sub>3</sub> ]n • 5n • H <sub>2</sub> O} <sup>[e]</sup>                                                                                                                                                                                                                                                                                                                                                                                                                                                 | ≈3.0 | [16e] |
| {[Pb(Tab) <sub>2</sub> ] <sub>2</sub> (PF <sub>6</sub> ) <sub>4</sub> ] • 2MeCN • DMF} <sup>[c]</sup>                                                                                                                                                                                                                                                                                                                                                                                                                                                                                    | ≈3.0 | [16d] |
| {[Ni <sub>2</sub> (bbim)(H <sub>2</sub> bbim) <sub>4</sub> ] • 2CH <sub>3</sub> COO • CH <sub>3</sub> CN} <sub>2</sub> <sup>[f]</sup>                                                                                                                                                                                                                                                                                                                                                                                                                                                    | ≈4.8 | [16b] |
| [Sr(μ-BDC)] <sub>n</sub> <sup>[g]</sup>                                                                                                                                                                                                                                                                                                                                                                                                                                                                                                                                                  | ≈4.9 | [17b] |
| {[(C <sub>3</sub> H <sub>7</sub> ) <sub>2</sub> NH <sub>2</sub> ][Cr <sub>7</sub> NiF <sub>8</sub> (O <sub>2</sub> C <sub>4</sub> H <sub>5</sub> ) <sub>16</sub> ]-MMA}                                                                                                                                                                                                                                                                                                                                                                                                                  | ≈5.0 | [17c] |
| [Zn(TMPT) <sub>2</sub> ] <sub>n</sub> <sup>[h]</sup>                                                                                                                                                                                                                                                                                                                                                                                                                                                                                                                                     | ≈6.0 | [17d] |
| [Cu <sub>2</sub> (EBTC)] <sub>n</sub> <sup>[i]</sup>                                                                                                                                                                                                                                                                                                                                                                                                                                                                                                                                     | ≈6.2 | [17e] |
| <p>[a] MeIM=2-methylimidazolate</p> <p>[b] 1,3-bdc=benzene-1,3-dicarboxylic acid</p> <p>[c] Tab=4-(trimethylammonio) benzenethiolate      4,4-bipy=4,4-bipyridine</p> <p>[d] L-trp= L-tryptophan      bpe=1,2-bis(4-pyridyl)ethylene</p> <p>[e] D-cam= D(+)-camphoric acid      2-Hpao=2-pyridinealoxime</p> <p>3-abpt=4-amino-3,5-bis(3- pyridyl)-1,2,4-triazole</p> <p>[f] H2bbim=bisbenzimidazole      [g] BDC= benzene-1,4-dicarboxylate</p> <p>[h] TMPT=5-(4-[(1H-1,2,4-triazol-1-yl)methyl]phenyl)-2H-tetrazole</p> <p>[i] EBTC=1,1'-ethynebenzene-3,3',5,5'-tet-racarboxylate</p> |      |       |
